# Supplementary material for: Niche partitioning facilitates coexistence of closely related gut bacteria
Source: bioRxiv preprint, doi:10.1101/2021.03.12.434400, version 3 (2021-06-26)
Supplement: Supplemental dataset 6 [file 434400_file08.xlsx]

## Sheet: 183_up_SWPG_SW
Category	DEG	Subtotal	COG_cat_description	p_raw	p_adj	Significant
COG A	0	0	RNA processing and modification	1	1	FALSE
COG C	17	50	Energy production and conversion	2.44219e-07	3.41906e-06	TRUE
COG B	0	0	Chromatin structure and dynamics	1	1	FALSE
COG E	2	97	Amino acid transport and metabolism	0.998646	1	FALSE
COG D	0	25	Cell cycle control, cell division, chromosome partitioning	1	1	FALSE
COG G	47	191	Carbohydrate transport and metabolism	4.31522e-13	1.20826e-11	TRUE
COG F	0	61	Nucleotide transport and metabolism	1	1	FALSE
COG I	8	49	Lipid transport and metabolism	0.0529257	0.37048	FALSE
COG H	5	61	Coenzyme transport and metabolism	0.612569	1	FALSE
COG K	7	109	Transcription	0.844394	1	FALSE
COG J	1	177	Translation, ribosomal structure and biogenesis	1	1	FALSE
COG M	2	79	Cell wall/membrane/envelope biogenesis	0.993847	1	FALSE
COG L	1	79	Replication, recombination and repair	0.999302	1	FALSE
COG O	0	39	Posttranslational modification, protein turnover, chaperones	1	1	FALSE
COG N	1	7	Cell motility	0.46695	1	FALSE
COG Q	5	17	Secondary metabolites biosynthesis, transport and catabolism	0.011501	0.107343	FALSE
COG P	3	50	Inorganic ion transport and metabolism	0.818485	1	FALSE
COG S	8	78	Function unknown	0.351865	1	FALSE
COG R	12	110	General function prediction only	0.227573	1	FALSE
COG U	0	13	Intracellular trafficking, secretion, and vesicular transport	1	1	FALSE
COG T	3	54	Signal transduction mechanisms	0.857351	1	FALSE
COG W	0	1	Extracellular structures	1	1	FALSE
COG V	2	55	Defense mechanisms	0.958044	1	FALSE
COG Y	0	0	Nuclear structure	1	1	FALSE
COG X	0	8	Mobilome: prophages, transposons	1	1	FALSE
COG Z	0	0	Cytoskeleton	1	1	FALSE
No COG	37	388		0.2504	1	FALSE
Total COG	105	1267		0.809431	1	FALSE

## Sheet: 183_down_SWPG_SW
Category	DEG	Subtotal	COG_cat_description	p_raw	p_adj	Significant
COG A	0	0	RNA processing and modification	1	1	FALSE
COG C	0	50	Energy production and conversion	1	1	FALSE
COG B	0	0	Chromatin structure and dynamics	1	1	FALSE
COG E	4	97	Amino acid transport and metabolism	0.191357	1	FALSE
COG D	0	25	Cell cycle control, cell division, chromosome partitioning	1	1	FALSE
COG G	2	191	Carbohydrate transport and metabolism	0.950883	1	FALSE
COG F	2	61	Nucleotide transport and metabolism	0.425491	1	FALSE
COG I	3	49	Lipid transport and metabolism	0.105926	1	FALSE
COG H	0	61	Coenzyme transport and metabolism	1	1	FALSE
COG K	1	109	Transcription	0.932062	1	FALSE
COG J	5	177	Translation, ribosomal structure and biogenesis	0.406419	1	FALSE
COG M	0	79	Cell wall/membrane/envelope biogenesis	1	1	FALSE
COG L	1	79	Replication, recombination and repair	0.854901	1	FALSE
COG O	1	39	Posttranslational modification, protein turnover, chaperones	0.609768	1	FALSE
COG N	0	7	Cell motility	1	1	FALSE
COG Q	0	17	Secondary metabolites biosynthesis, transport and catabolism	1	1	FALSE
COG P	2	50	Inorganic ion transport and metabolism	0.331112	1	FALSE
COG S	2	78	Function unknown	0.557144	1	FALSE
COG R	0	110	General function prediction only	1	1	FALSE
COG U	0	13	Intracellular trafficking, secretion, and vesicular transport	1	1	FALSE
COG T	2	54	Signal transduction mechanisms	0.366036	1	FALSE
COG W	0	1	Extracellular structures	1	1	FALSE
COG V	2	55	Defense mechanisms	0.374673	1	FALSE
COG Y	0	0	Nuclear structure	1	1	FALSE
COG X	0	8	Mobilome: prophages, transposons	1	1	FALSE
COG Z	0	0	Cytoskeleton	1	1	FALSE
No COG	14	388		0.0523517	1	FALSE
Total COG	25	1267		0.975695	1	FALSE

## Sheet: 184_up_SWPG_SW
Category	DEG	Subtotal	COG_cat_description	p_raw	p_adj	Significant
COG A	0	0	RNA processing and modification	1	1	FALSE
COG C	7	55	Energy production and conversion	0.0691719	0.968407	FALSE
COG B	0	0	Chromatin structure and dynamics	1	1	FALSE
COG E	0	92	Amino acid transport and metabolism	1	1	FALSE
COG D	0	23	Cell cycle control, cell division, chromosome partitioning	1	1	FALSE
COG G	57	231	Carbohydrate transport and metabolism	4.11872e-22	1.15324e-20	TRUE
COG F	0	62	Nucleotide transport and metabolism	1	1	FALSE
COG I	2	44	Lipid transport and metabolism	0.80468	1	FALSE
COG H	1	62	Coenzyme transport and metabolism	0.987133	1	FALSE
COG K	7	114	Transcription	0.649988	1	FALSE
COG J	0	175	Translation, ribosomal structure and biogenesis	1	1	FALSE
COG M	8	86	Cell wall/membrane/envelope biogenesis	0.210559	1	FALSE
COG L	0	81	Replication, recombination and repair	1	1	FALSE
COG O	1	42	Posttranslational modification, protein turnover, chaperones	0.946729	1	FALSE
COG N	1	8	Cell motility	0.424955	1	FALSE
COG Q	2	14	Secondary metabolites biosynthesis, transport and catabolism	0.238717	1	FALSE
COG P	0	55	Inorganic ion transport and metabolism	1	1	FALSE
COG S	5	84	Function unknown	0.672149	1	FALSE
COG R	9	112	General function prediction only	0.328743	1	FALSE
COG U	0	15	Intracellular trafficking, secretion, and vesicular transport	1	1	FALSE
COG T	3	57	Signal transduction mechanisms	0.745801	1	FALSE
COG W	0	2	Extracellular structures	1	1	FALSE
COG V	1	63	Defense mechanisms	0.98802	1	FALSE
COG Y	0	0	Nuclear structure	1	1	FALSE
COG X	0	22	Mobilome: prophages, transposons	1	1	FALSE
COG Z	0	0	Cytoskeleton	1	1	FALSE
No COG	34	529		0.638725	1	FALSE
Total COG	92	1360		0.441018	1	FALSE

## Sheet: 184_down_SWPG_SW
Category	DEG	Subtotal	COG_cat_description	p_raw	p_adj	Significant
COG A	0	0	RNA processing and modification	1	1	FALSE
COG C	0	55	Energy production and conversion	1	1	FALSE
COG B	0	0	Chromatin structure and dynamics	1	1	FALSE
COG E	11	92	Amino acid transport and metabolism	0.00051537	0.0144304	FALSE
COG D	0	23	Cell cycle control, cell division, chromosome partitioning	1	1	FALSE
COG G	11	231	Carbohydrate transport and metabolism	0.258507	1	FALSE
COG F	0	62	Nucleotide transport and metabolism	1	1	FALSE
COG I	5	44	Lipid transport and metabolism	0.0238515	0.333921	FALSE
COG H	0	62	Coenzyme transport and metabolism	1	1	FALSE
COG K	6	114	Transcription	0.264922	1	FALSE
COG J	0	175	Translation, ribosomal structure and biogenesis	1	1	FALSE
COG M	1	86	Cell wall/membrane/envelope biogenesis	0.967325	1	FALSE
COG L	2	81	Replication, recombination and repair	0.825499	1	FALSE
COG O	1	42	Posttranslational modification, protein turnover, chaperones	0.808044	1	FALSE
COG N	0	8	Cell motility	1	1	FALSE
COG Q	2	14	Secondary metabolites biosynthesis, transport and catabolism	0.0970426	0.905731	FALSE
COG P	1	55	Inorganic ion transport and metabolism	0.885722	1	FALSE
COG S	4	84	Function unknown	0.399532	1	FALSE
COG R	5	112	General function prediction only	0.42591	1	FALSE
COG U	0	15	Intracellular trafficking, secretion, and vesicular transport	1	1	FALSE
COG T	3	57	Signal transduction mechanisms	0.371354	1	FALSE
COG W	0	2	Extracellular structures	1	1	FALSE
COG V	1	63	Defense mechanisms	0.917102	1	FALSE
COG Y	0	0	Nuclear structure	1	1	FALSE
COG X	1	22	Mobilome: prophages, transposons	0.576762	1	FALSE
COG Z	0	0	Cytoskeleton	1	1	FALSE
No COG	24	529		0.184903	1	FALSE
Total COG	48	1360		0.876077	1	FALSE

## Sheet: 185_up_SWPG_SW
Category	DEG	Subtotal	COG_cat_description	p_raw	p_adj	Significant
COG A	0	0	RNA processing and modification	1	1	FALSE
COG C	2	44	Energy production and conversion	0.677141	1	FALSE
COG B	0	0	Chromatin structure and dynamics	1	1	FALSE
COG E	2	100	Amino acid transport and metabolism	0.972331	1	FALSE
COG D	1	24	Cell cycle control, cell division, chromosome partitioning	0.724184	1	FALSE
COG G	13	151	Carbohydrate transport and metabolism	0.0417144	0.584002	FALSE
COG F	3	60	Nucleotide transport and metabolism	0.612389	1	FALSE
COG I	2	40	Lipid transport and metabolism	0.624795	1	FALSE
COG H	2	47	Coenzyme transport and metabolism	0.712451	1	FALSE
COG K	6	100	Transcription	0.417939	1	FALSE
COG J	1	174	Translation, ribosomal structure and biogenesis	0.999949	1	FALSE
COG M	7	87	Cell wall/membrane/envelope biogenesis	0.1589	0.889841	FALSE
COG L	2	77	Replication, recombination and repair	0.919212	1	FALSE
COG O	1	39	Posttranslational modification, protein turnover, chaperones	0.878065	1	FALSE
COG N	2	9	Cell motility	0.0753778	0.703526	FALSE
COG Q	1	11	Secondary metabolites biosynthesis, transport and catabolism	0.44436	1	FALSE
COG P	3	50	Inorganic ion transport and metabolism	0.485968	1	FALSE
COG S	2	72	Function unknown	0.899012	1	FALSE
COG R	5	91	General function prediction only	0.516218	1	FALSE
COG U	0	14	Intracellular trafficking, secretion, and vesicular transport	1	1	FALSE
COG T	3	42	Signal transduction mechanisms	0.372926	1	FALSE
COG W	0	1	Extracellular structures	1	1	FALSE
COG V	2	36	Defense mechanisms	0.566266	1	FALSE
COG Y	0	0	Nuclear structure	1	1	FALSE
COG X	1	2	Mobilome: prophages, transposons	0.101029	0.707206	FALSE
COG Z	0	0	Cytoskeleton	1	1	FALSE
No COG	23	310		0.0355115	0.584002	FALSE
Total COG	53	1156		0.980858	1	FALSE

## Sheet: 185_down_SWPG_SW
Category	DEG	Subtotal	COG_cat_description	p_raw	p_adj	Significant
COG A	0	0	RNA processing and modification	1	1	FALSE
COG C	3	44	Energy production and conversion	0.812721	1	FALSE
COG B	0	0	Chromatin structure and dynamics	1	1	FALSE
COG E	27	100	Amino acid transport and metabolism	1.59416e-07	4.46365e-06	TRUE
COG D	0	24	Cell cycle control, cell division, chromosome partitioning	1	1	FALSE
COG G	11	151	Carbohydrate transport and metabolism	0.882492	1	FALSE
COG F	10	60	Nucleotide transport and metabolism	0.0553039	0.51617	FALSE
COG I	3	40	Lipid transport and metabolism	0.757231	1	FALSE
COG H	3	47	Coenzyme transport and metabolism	0.847014	1	FALSE
COG K	6	100	Transcription	0.934071	1	FALSE
COG J	4	174	Translation, ribosomal structure and biogenesis	0.999988	1	FALSE
COG M	3	87	Cell wall/membrane/envelope biogenesis	0.993291	1	FALSE
COG L	4	77	Replication, recombination and repair	0.950221	1	FALSE
COG O	1	39	Posttranslational modification, protein turnover, chaperones	0.98166	1	FALSE
COG N	1	9	Cell motility	0.598581	1	FALSE
COG Q	3	11	Secondary metabolites biosynthesis, transport and catabolism	0.0808706	0.538609	FALSE
COG P	0	50	Inorganic ion transport and metabolism	1	1	FALSE
COG S	9	72	Function unknown	0.249889	1	FALSE
COG R	9	91	General function prediction only	0.519452	1	FALSE
COG U	1	14	Intracellular trafficking, secretion, and vesicular transport	0.758865	1	FALSE
COG T	2	42	Signal transduction mechanisms	0.924686	1	FALSE
COG W	1	1	Extracellular structures	0.0961801	0.538609	FALSE
COG V	4	36	Defense mechanisms	0.46132	1	FALSE
COG Y	0	0	Nuclear structure	1	1	FALSE
COG X	0	2	Mobilome: prophages, transposons	1	1	FALSE
COG Z	0	0	Cytoskeleton	1	1	FALSE
No COG	43	310		0.00389411	0.0545175	FALSE
Total COG	98	1156		0.997897	1	FALSE

## Sheet: 186_up_SWPG_SW
Category	DEG	Subtotal	COG_cat_description	p_raw	p_adj	Significant
COG A	0	0	RNA processing and modification	1	1	FALSE
COG C	17	59	Energy production and conversion	2.52875e-06	3.54025e-05	TRUE
COG B	0	0	Chromatin structure and dynamics	1	1	FALSE
COG E	4	113	Amino acid transport and metabolism	0.989419	1	FALSE
COG D	1	25	Cell cycle control, cell division, chromosome partitioning	0.889169	1	FALSE
COG G	56	241	Carbohydrate transport and metabolism	5.86532e-15	1.64229e-13	TRUE
COG F	0	60	Nucleotide transport and metabolism	1	1	FALSE
COG I	2	59	Lipid transport and metabolism	0.965255	1	FALSE
COG H	4	58	Coenzyme transport and metabolism	0.730127	1	FALSE
COG K	11	117	Transcription	0.387864	1	FALSE
COG J	1	177	Translation, ribosomal structure and biogenesis	1	1	FALSE
COG M	8	82	Cell wall/membrane/envelope biogenesis	0.378587	1	FALSE
COG L	0	76	Replication, recombination and repair	1	1	FALSE
COG O	0	38	Posttranslational modification, protein turnover, chaperones	1	1	FALSE
COG N	0	6	Cell motility	1	1	FALSE
COG Q	1	16	Secondary metabolites biosynthesis, transport and catabolism	0.754409	1	FALSE
COG P	5	55	Inorganic ion transport and metabolism	0.49353	1	FALSE
COG S	4	78	Function unknown	0.905145	1	FALSE
COG R	6	108	General function prediction only	0.903866	1	FALSE
COG U	0	12	Intracellular trafficking, secretion, and vesicular transport	1	1	FALSE
COG T	9	57	Signal transduction mechanisms	0.0434566	0.405595	FALSE
COG W	0	0	Extracellular structures	1	1	FALSE
COG V	2	51	Defense mechanisms	0.936963	1	FALSE
COG Y	0	0	Nuclear structure	1	1	FALSE
COG X	0	19	Mobilome: prophages, transposons	1	1	FALSE
COG Z	0	0	Cytoskeleton	1	1	FALSE
No COG	37	420		0.386592	1	FALSE
Total COG	112	1361		0.687053	1	FALSE

## Sheet: 186_down_SWPG_SW
Category	DEG	Subtotal	COG_cat_description	p_raw	p_adj	Significant
COG A	0	0	RNA processing and modification	1	1	FALSE
COG C	0	59	Energy production and conversion	1	1	FALSE
COG B	0	0	Chromatin structure and dynamics	1	1	FALSE
COG E	7	113	Amino acid transport and metabolism	0.00968814	0.271268	FALSE
COG D	0	25	Cell cycle control, cell division, chromosome partitioning	1	1	FALSE
COG G	3	241	Carbohydrate transport and metabolism	0.915335	1	FALSE
COG F	1	60	Nucleotide transport and metabolism	0.741079	1	FALSE
COG I	4	59	Lipid transport and metabolism	0.0376405	0.351311	FALSE
COG H	0	58	Coenzyme transport and metabolism	1	1	FALSE
COG K	0	117	Transcription	1	1	FALSE
COG J	1	177	Translation, ribosomal structure and biogenesis	0.9839	1	FALSE
COG M	0	82	Cell wall/membrane/envelope biogenesis	1	1	FALSE
COG L	5	76	Replication, recombination and repair	0.0229032	0.320646	FALSE
COG O	1	38	Posttranslational modification, protein turnover, chaperones	0.572725	1	FALSE
COG N	0	6	Cell motility	1	1	FALSE
COG Q	1	16	Secondary metabolites biosynthesis, transport and catabolism	0.29937	1	FALSE
COG P	1	55	Inorganic ion transport and metabolism	0.709695	1	FALSE
COG S	2	78	Function unknown	0.516487	1	FALSE
COG R	3	108	General function prediction only	0.424993	1	FALSE
COG U	0	12	Intracellular trafficking, secretion, and vesicular transport	1	1	FALSE
COG T	2	57	Signal transduction mechanisms	0.357008	1	FALSE
COG W	0	0	Extracellular structures	1	1	FALSE
COG V	0	51	Defense mechanisms	1	1	FALSE
COG Y	0	0	Nuclear structure	1	1	FALSE
COG X	0	19	Mobilome: prophages, transposons	1	1	FALSE
COG Z	0	0	Cytoskeleton	1	1	FALSE
No COG	10	420		0.441424	1	FALSE
Total COG	29	1361		0.698671	1	FALSE

## Sheet: 183_MIX_up_PE_G
Category	DEG	Subtotal	COG_cat_description	p_raw	p_adj	Significant
COG A	0	0	RNA processing and modification	1	1	FALSE
COG C	11	50	Energy production and conversion	0.00778167	0.0726289	FALSE
COG B	0	0	Chromatin structure and dynamics	1	1	FALSE
COG E	2	97	Amino acid transport and metabolism	0.999639	1	FALSE
COG D	2	25	Cell cycle control, cell division, chromosome partitioning	0.726201	1	FALSE
COG G	41	191	Carbohydrate transport and metabolism	2.53292e-07	7.09218e-06	TRUE
COG F	3	61	Nucleotide transport and metabolism	0.951635	1	FALSE
COG I	6	49	Lipid transport and metabolism	0.356509	1	FALSE
COG H	5	61	Coenzyme transport and metabolism	0.739917	1	FALSE
COG K	14	109	Transcription	0.182978	1	FALSE
COG J	3	177	Translation, ribosomal structure and biogenesis	0.999999	1	FALSE
COG M	5	79	Cell wall/membrane/envelope biogenesis	0.907663	1	FALSE
COG L	5	79	Replication, recombination and repair	0.907663	1	FALSE
COG O	5	39	Posttranslational modification, protein turnover, chaperones	0.34256	1	FALSE
COG N	0	7	Cell motility	1	1	FALSE
COG Q	6	17	Secondary metabolites biosynthesis, transport and catabolism	0.00422986	0.0592181	FALSE
COG P	3	50	Inorganic ion transport and metabolism	0.888165	1	FALSE
COG S	5	78	Function unknown	0.901697	1	FALSE
COG R	13	110	General function prediction only	0.289203	1	FALSE
COG U	0	13	Intracellular trafficking, secretion, and vesicular transport	1	1	FALSE
COG T	4	54	Signal transduction mechanisms	0.800165	1	FALSE
COG W	0	1	Extracellular structures	1	1	FALSE
COG V	2	55	Defense mechanisms	0.978843	1	FALSE
COG Y	0	0	Nuclear structure	1	1	FALSE
COG X	0	8	Mobilome: prophages, transposons	1	1	FALSE
COG Z	0	0	Cytoskeleton	1	1	FALSE
No COG	45	388		0.120866	0.846061	FALSE
Total COG	119	1267		0.912887	1	FALSE

## Sheet: 183_MIX_down_PE_G
Category	DEG	Subtotal	COG_cat_description	p_raw	p_adj	Significant
COG A	0	0	RNA processing and modification	1	1	FALSE
COG C	0	50	Energy production and conversion	1	1	FALSE
COG B	0	0	Chromatin structure and dynamics	1	1	FALSE
COG E	8	97	Amino acid transport and metabolism	0.144904	0.53178	FALSE
COG D	1	25	Cell cycle control, cell division, chromosome partitioning	0.751501	1	FALSE
COG G	0	191	Carbohydrate transport and metabolism	1	1	FALSE
COG F	2	61	Nucleotide transport and metabolism	0.851801	1	FALSE
COG I	5	49	Lipid transport and metabolism	0.118985	0.53178	FALSE
COG H	2	61	Coenzyme transport and metabolism	0.851801	1	FALSE
COG K	4	109	Transcription	0.852546	1	FALSE
COG J	15	177	Translation, ribosomal structure and biogenesis	0.0455542	0.508104	FALSE
COG M	6	79	Cell wall/membrane/envelope biogenesis	0.247893	0.771222	FALSE
COG L	1	79	Replication, recombination and repair	0.988624	1	FALSE
COG O	5	39	Posttranslational modification, protein turnover, chaperones	0.0544398	0.508104	FALSE
COG N	1	7	Cell motility	0.321356	0.899796	FALSE
COG Q	1	17	Secondary metabolites biosynthesis, transport and catabolism	0.611088	1	FALSE
COG P	5	50	Inorganic ion transport and metabolism	0.126867	0.53178	FALSE
COG S	7	78	Function unknown	0.12103	0.53178	FALSE
COG R	3	110	General function prediction only	0.945025	1	FALSE
COG U	2	13	Intracellular trafficking, secretion, and vesicular transport	0.151937	0.53178	FALSE
COG T	0	54	Signal transduction mechanisms	1	1	FALSE
COG W	0	1	Extracellular structures	1	1	FALSE
COG V	7	55	Defense mechanisms	0.0251732	0.508104	FALSE
COG Y	0	0	Nuclear structure	1	1	FALSE
COG X	0	8	Mobilome: prophages, transposons	1	1	FALSE
COG Z	0	0	Cytoskeleton	1	1	FALSE
No COG	20	388		0.630356	1	FALSE
Total COG	69	1267		0.470691	1	FALSE

[truncated: 30 more sheets: 184_MIX_up_PE_G, 184_MIX_down_PE_G, 185_MIX_up_PE_G, 185_MIX_down_PE_G, 186_MIX_up_PE_G, 186_MIX_down_PE_G, 183_ind_up_PE_G, 183_ind_down_PE_G, 184_ind_up_PE_G, 184_ind_down_PE_G, 185_ind_up_PE_G, 185_ind_down_PE_G, 186_ind_up_PE_G, 186_ind_down_PE_G, 183_MIX_ind_up_PE, 183_MIX_ind_down_PE, 184_MIX_ind_up_PE, 184_MIX_ind_down_PE, 185_MIX_ind_up_PE, 185_MIX_ind_down_PE …]
